# Supplementary material for: Peripapillary Retinal Nerve Fiber Layer Thickness and the Evolution of Cognitive Performance in an Elderly Population
Source: PubMed Central journal article supplement (PMC5358525; doi:10.3389/fneur.2017.00093), 2017-03-21
Supplement: Data_Sheet_2.pdf [file Data_Sheet_2.pdf]

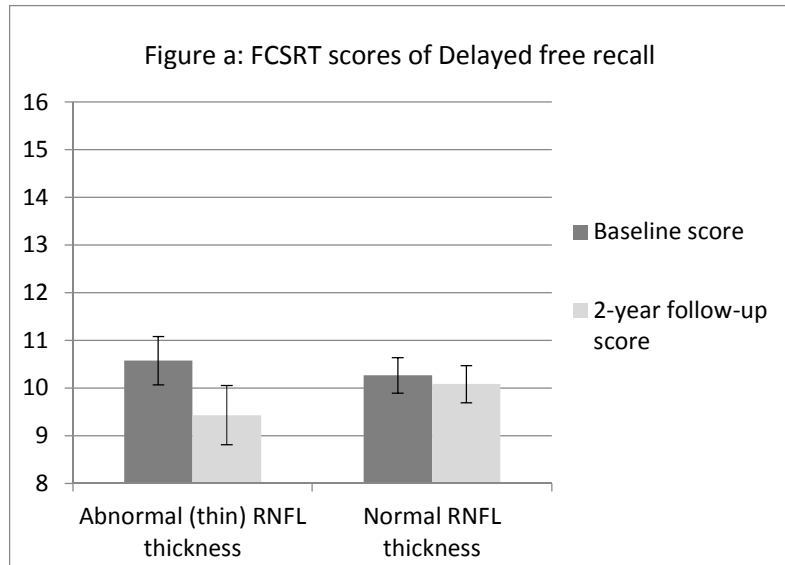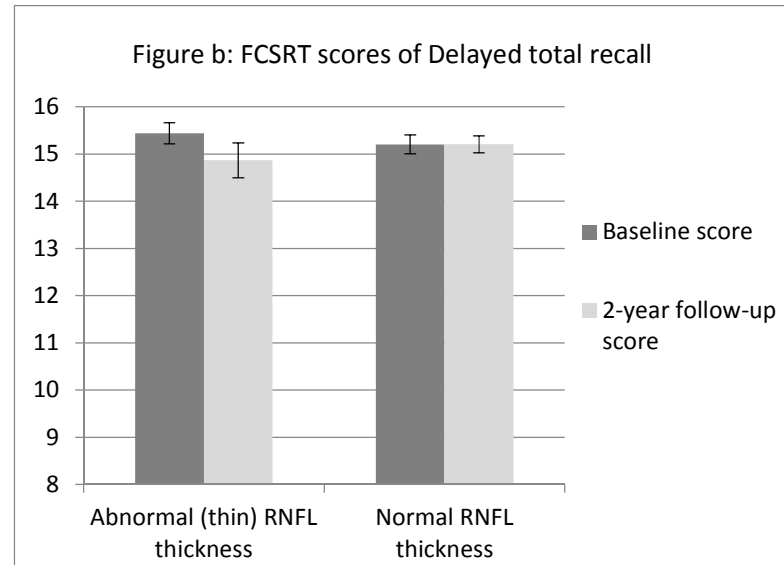

**Supplementary Figure: Mean (and 95%CI) FCSRT score at baseline and at the 2-year follow-up according to RNFL value at baseline. Figure a: Delayed free recall score. Figure b: Delayed total recall score**

FCSRT: *Free and Cued Selective Reminding Test*

95%CI: *Confidence Interval at 95%*

RNFL: *Retinal Nerve Fiber Layer*

Abnormal and normal RNFL thicknesses are provided by the Spectralis software: abnormal values (including outside normal limits (lowest 1% of the distribution) and borderline (bottom 1% to 5% of the distribution)); and within normal (above 5%) based on the age-matched comparison with an internal normative database of 201 healthy eyes of Caucasian patients. For each participant, the worse eye is considered here.

**Supplementary table: Mean decline of cognitive performance between baseline and follow-up assessment, N=427.**

| Cognitive assessment tests                     | Mean difference score<br>(follow-up score -<br>baseline score) | 95% CI of the<br>mean difference | <i>p</i> *       |
|------------------------------------------------|----------------------------------------------------------------|----------------------------------|------------------|
| MMSE, mean (SD)                                | -0.22                                                          | -0.40; -0.04                     | <i>0.015</i>     |
| Isaacs' set test at 30", mean (SD)             | -2.09                                                          | -2.72; -1.46                     | <i>&lt;.0001</i> |
| FCSRT, mean (SD)                               |                                                                |                                  |                  |
| Score of <i>three free recalls</i>             | -1.19                                                          | -1.78; -0.61                     | <i>&lt;.0001</i> |
| Score of <i>three free plus cued recalls</i>   | -1.02                                                          | -1.39; -0.65                     | <i>&lt;.0001</i> |
| Score of <i>delayed free recall</i>            | -0.55                                                          | -0.80; -0.30                     | <i>&lt;.0001</i> |
| Score of <i>delayed free plus cued recalls</i> | -0.25                                                          | -0.40; -0.10                     | <i>0.0009</i>    |

\* Student t-test for paired data

SD: *Standard deviation*
